# Supplementary material
Source: PubMed Central journal article supplement (PMC5520429)
Supplement: IAI.00327-17_zii999092093s2.pdf [file IAI.00327-17_zii999092093s2.pdf]

**Table S2. Oligonucleotides used in this work.**

| Name       | Sequence (5' to 3')     | Application            |
|------------|-------------------------|------------------------|
| MUT14730F  | GGTTTAAAGCGTGCAGAG      | Mutant construction    |
| MUT14730R  | GTCCGATTTAATTGAGCG      | Mutant construction    |
| COM14730F  | GTCGTAAGTGGACCAGATG     | Mutant verification    |
| COM14730R  | CATGTAGGTAACGCCTCC      | Mutant verification    |
| MUT14735F  | GGTGTTCGCTGGGTTTGTGG    | Mutant construction    |
| MUT14735R  | CGTTGGTAAAATGACATGC     | Mutant construction    |
| COM14735F  | GGCAACATTTGGCAGCCAGC    | Mutant verification    |
| COM14735R  | GCTCAAATACTGCGAC        | Mutant verification    |
| MUT14740F  | CCAGCAGGCTTTGCTTGATC    | Mutant construction    |
| MUT14740R  | GCTGTAAGTCAAGCGGAAGC    | Mutant construction    |
| COM14740F  | CCATTGGCGCAATTATTCACG   | Mutant verification    |
| COM14740R  | GCACATCGCCATTAATAGTTGC  | Mutant verification    |
| MUT16805F  | TGGTGGTTCACGCAGCGC      | Mutant construction    |
| MUT16805R  | CATTTGCCACTGGTACG       | Mutant construction    |
| COM16805F  | GGTGCCGGTTTCATTGTG      | Mutant verification    |
| COM16805R  | GCTGTGGCCATATGTCC       | Mutant verification    |
| MUT17030F  | GACTGCTTCGGCACTGG       | Mutant construction    |
| MUT17030R  | GTGCCAGCATTGAGCATAG     | Mutant construction    |
| COM17030F  | CGTGTCACAGGAACTGC       | Mutant verification    |
| COM17030R  | CACCTGCCAGCAATAATTC     | Mutant verification    |
| MUT17035F  | GCAGACTTAAAGGTATTGCC    | Mutant construction    |
| MUT17035R  | CGAAATAGTGAATATGTACATCG | Mutant construction    |
| COM17035F  | CAATCAGTTCGTGATTTAGC    | Mutant verification    |
| COM17035R  | GGTAATTCGGGTTGCATATGAGC | Mutant verification    |
| MUT17040F  | CGACATGCCAATCCACTAC     | Mutant construction    |
| MUT17040R  | CGATACCAGCCGCTGCACTTGC  | Mutant construction    |
| COM17040F  | GCGGTTTTATTGGCTTTACC    | Mutant verification    |
| COM17040R  | CGTTCGAGCTTGGCATAGACG   | Mutant verification    |
| MUT17045F  | ACGTGGTCTGAACTCACC      | Mutant construction    |
| MUT17045R  | AATGCGTCCAGCAATTGC      | Mutant construction    |
| COM17045F  | AAATCCATCTTCGACTCC      | Mutant verification    |
| COM17045R  | AACGACCGTACCATACGC      | Mutant verification    |
| MUT17050F  | CCTGTCTTTCGCGAAGC       | Mutant construction    |
| MUT17050R  | CCATGCCTTCATAGGCTTGC    | Mutant construction    |
| COM17050F  | GGATTAATAATCGTTTCTG     | Mutant verification    |
| COM17050R  | GCCATTTTAGTATCGTCTAGC   | Mutant verification    |
| 14730FXba* | ATGAGTGTACTTGAAGCCAAAC  | Mutant complementation |
| 14730RXba* | TCATGTAGGTAACGCCTCC     | Mutant complementation |
| 16805FXba* | ATGACCATTATCGGACACAAC   | Mutant complementation |
| 16805RXba* | TTAGATCGCTTCTTTAGTCATC  | Mutant complementation |
| 17040FXba* | ATGGATTTCGAAAAGGATG     | Mutant complementation |
| 17040RXba* | TTACAAAGGCTTTTGAATATTC  | Mutant complementation |
| 17045FXba* | GCCAGCTCCTAGACCATAGGC   | Mutant complementation |
| 17045RXba* | CTGAAATTTCTCCAGAAACG    | Mutant complementation |
| rpoBF      | ATGGCATACTCATATACCG     | Mutant complementation |
| rpoBR      | TTAGTCACCATTTTTTAGTTC   | Mutant complementation |

|                              |                             |                                                           |
|------------------------------|-----------------------------|-----------------------------------------------------------|
| 17030R                       | GCCTGATTAACCTCTTGCTCG       | RT-PCR assay                                              |
| 17035F                       | GCAGGCGATGTACATATTCAC       | RT-PCR assay                                              |
| 17035R                       | GCAGTGCGTTGGATCTGGATG       | RT-PCR assay                                              |
| 17040F                       | CACGGGAAATATGGCTGCTGG       | RT-PCR assay                                              |
| 14730RTF                     | TAAAGCGTGCAGAGATTGAGAAAC    | RT-qPCR assay                                             |
| 14730RTR                     | TTGAATCCATAAATCGAGCACTAA    | RT-qPCR assay                                             |
| 16805RTF                     | GCCACTTGCACGCCTACA          | RT-qPCR assay                                             |
| 16805RTR                     | CTTTTCACCACTACAGAGCAACCT    | RT-qPCR assay                                             |
| 17040RTF                     | GTAGTACTGACCGCCTGAACGA      | RT-qPCR assay                                             |
| 17040RTR                     | TTAAAAGTCCGATCCCAAATG       | RT-qPCR assay                                             |
| 17045RTF                     | CGGCTACCCTGTTGAGTTTCCTG     | RT-qPCR assay                                             |
| 17045RTR                     | CGATAGTACCTGCACCAATGTCTT    | RT-qPCR assay                                             |
| GyrBR <sup>TF</sup>          | TACAGACGACGGTACCGG          | RT-qPCR assay                                             |
| GyrBR <sup>TR</sup>          | CTGACCGATTTCATCTTCG         | RT-qPCR assay                                             |
| Ap <sup>R</sup> <sup>F</sup> | CTCCTTACGCATCTGTGCGG        | Amplification of the $\beta$ -<br>lactamase coding region |
| Ap <sup>R</sup> <sup>R</sup> | TTACCAATGCTTAATCAGTG        | Amplification of the $\beta$ -<br>lactamase coding region |
| M13FpUC                      | GTTTTCCCAGTCACGAC           | Sequencing primer for<br>pCR-BluntII-TOPO<br>vector       |
| M13RpUC                      | CAGGAAACAGCTATGAC           | Sequencing primer for<br>pCR-BluntII-TOPO<br>vector       |
| pBAV1KF                      | GACGAACTCCAATTCCTGTTTCCTTGC | Sequencing primer for<br>pBAV1K-T5-gfp vector             |
| pBAV1KR                      | GGAGAGCGTTCACCGACAAACAACAG  | Sequencing primer for<br>pBAV1K-T5-gfp vector             |

\*Oligonucleotides including at the sequence 5'-ACTGTCTAGA to allow *Xba*I digestion.
