# Supplementary material
Source: PubMed Central journal article supplement (PMC5520429)
Supplement: IAI.00327-17_zii999092093s3.pdf [file IAI.00327-17_zii999092093s3.pdf]

**TABLE S3. Correspondence between the nomenclature of the new annotation (NZ\_CP018664.1) and the old annotation (CP000521.1) of the genes described in this work in the *A. baumannii* ATCC 17978 strain.**

| <b>NEW ANNOTATION</b> | <b>OLD ANNOTATION</b> | <b>ACCESSION NUMBER</b> |
|-----------------------|-----------------------|-------------------------|
| <i>AU097_RS14730</i>  | <i>A1S_1443</i>       | WP_000114468.1          |
| <i>AU097_RS14735</i>  | <i>A1S_1444</i>       | WP_001092658.1          |
| <i>AU097_RS14740</i>  | <i>A1S_1445</i>       | WP_001099243.1          |
| <i>AU097_RS16805</i>  | <i>A1S_1796/7</i>     | WP_005135215.1          |
| <i>AU097_RS17030</i>  | <i>A1S_1835</i>       | WP_000234449.1          |
| <i>AU097_RS17035</i>  | <i>A1S_1836</i>       | WP_001165788.1          |
| <i>AU097_RS17040</i>  | <i>A1S_1837/8</i>     | WP_000345069.1          |
| <i>AU097_RS17045</i>  | <i>A1S_1839</i>       | WP_001060808.1          |
| <i>AU097_RS17050</i>  | <i>A1S_1840</i>       | WP_000029961.1          |
